# Supplementary material
Source: publisher figshare collection journal article supplement (https://acs.figshare.com/ndownloader/files/7267178)
Supplement: Supplementary file 1 [file 7267178]

## *Supporting Information*

### **Metal-Organic Coordination Polymer to Prepare Density Controllable and High Nitrogen Doped Content Carbon/Graphene for High Performance Supercapacitors**

Jinwei Luo,<sup>†</sup> Wenbin Zhong,<sup>\*,†</sup> Yubo Zou,<sup>†</sup> Changlun Xiong,<sup>†</sup> Wantai Yang<sup>‡</sup>

<sup>†</sup> College of Materials Science and Engineering, Hunan University, Changsha, 410082, P. R. China.

<sup>‡</sup> Department of Polymer Science, Beijing University of Chemical Technology, Beijing, 100029, P. R. China.

\*E-mail: wbzhong@hnu.edu.cn

## 1. Raman spectra analysis of the as-prepared samples.

**Table S1.** The Raman spectra analysis of NCG<sub>Cu</sub>, NC<sub>Cu</sub>, NCG<sub>Fe</sub>, NC<sub>Fe</sub>, NCG<sub>Zn</sub> and NC<sub>Zn</sub>

| Samples           | D-Band | G-Band | I <sub>D</sub> /I <sub>G</sub> <sup>a</sup> |
|-------------------|--------|--------|---------------------------------------------|
| NCG <sub>Cu</sub> | 1333.4 | 1590.1 | 1.76                                        |
| NC <sub>Cu</sub>  | 1346.9 | 1584.2 | 2.04                                        |
| NCG <sub>Fe</sub> | 1335.1 | 1589.2 | 1.97                                        |
| NC <sub>Fe</sub>  | 1354.5 | 1585.8 | 2.05                                        |
| NCG <sub>Zn</sub> | 1326.7 | 1587.5 | 2.07                                        |
| NC <sub>Zn</sub>  | 1343.5 | 1588.3 | 2.31                                        |

<sup>a</sup> The ratio of I<sub>D</sub>/I<sub>G</sub> was calculated based on the peak area of D-Band and G-Band.

## 2. The porosity parameter of the carbon materials.

**Table S2.** Characteristic surface areas and pore structures of NCG<sub>Cu</sub>, NCG<sub>Fe</sub> and NCG<sub>Zn</sub> without treatment of acid

| Samples                                  | BET surface area                  |                    | Total pore                         | Average   |
|------------------------------------------|-----------------------------------|--------------------|------------------------------------|-----------|
|                                          | (m <sup>2</sup> g <sup>-1</sup> ) |                    | volume                             | pore size |
|                                          | Total                             | S <sub>micro</sub> | (cm <sup>3</sup> g <sup>-1</sup> ) | (nm)      |
| NCG <sub>Cu</sub> without acid treatment | 91.17                             | 19.29              | 0.232                              | 10.18     |
| NCG <sub>Fe</sub> without acid treatment | 209.0                             | 170.15             | 0.180                              | 3.45      |
| NCG <sub>Zn</sub> without acid treatment | 405.02                            | 368.52             | 0.228                              | 2.25      |

Notes: S<sub>micro</sub> represents the micropore area.

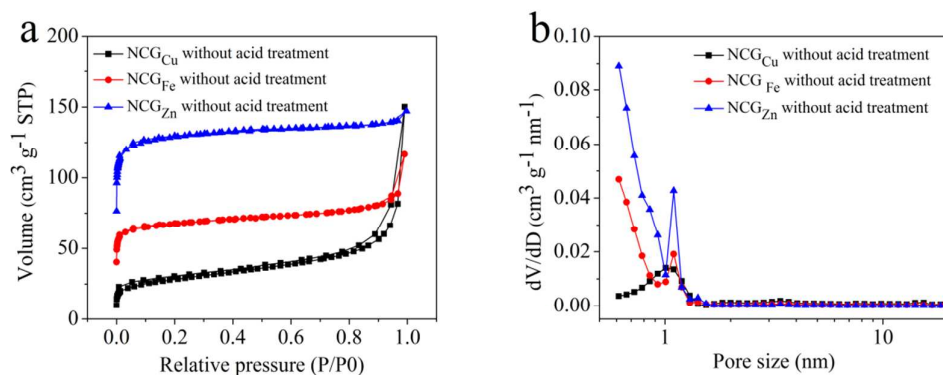

**Figure S1.** (a) Nitrogen adsorption-desorption isotherms and (b) pore size distribution of NCG<sub>Cu</sub>, NCG<sub>Fe</sub> and NCG<sub>Zn</sub>, which were not washed by acids. (STP = standard temperature and pressure).

### 3. XPS analysis of the as-prepared samples.

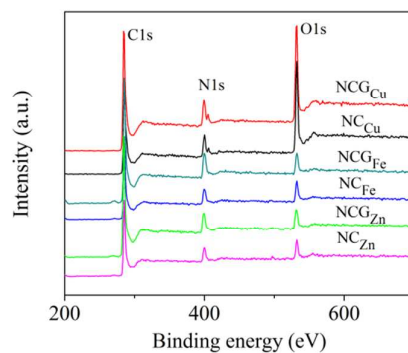

**Figure S2.** XPS survey of NCG<sub>Cu</sub>, NC<sub>Cu</sub>, NCG<sub>Fe</sub>, NC<sub>Fe</sub>, NCG<sub>Zn</sub> and NC<sub>Zn</sub>.

**Table S3.** The elemental composition and atomic contents (at.%) of NCG<sub>Cu</sub>, NC<sub>Cu</sub>, NCG<sub>Fe</sub>, NC<sub>Fe</sub>, NCG<sub>Zn</sub> and NC<sub>Zn</sub>

| Samples           | C     | N     | O     |
|-------------------|-------|-------|-------|
| NCG <sub>Cu</sub> | 68.81 | 10.68 | 20.51 |
| NC <sub>Cu</sub>  | 65.11 | 11.72 | 23.17 |
| NCG <sub>Fe</sub> | 81.43 | 12.99 | 5.58  |
| NC <sub>Fe</sub>  | 80.41 | 10.99 | 8.60  |
| NCG <sub>Zn</sub> | 83.16 | 11.21 | 5.63  |
| NC <sub>Zn</sub>  | 81.24 | 10.58 | 8.18  |

**Table S4.** Relative ratio (%) of different nitrogen components in NCG<sub>Cu</sub>, NC<sub>Cu</sub>, NCG<sub>Fe</sub>, NC<sub>Fe</sub>, NCG<sub>Zn</sub> and NC<sub>Zn</sub> from N 1s XPS spectra which were calculated based on the areas of the XPS peaks

| Samples            | Pyridinic-N<br>(N-6) | Pyrrolic/pyridone-N<br>(N-5) | Quaternary-N<br>(N-Q) | Pyridine-N<br>-oxide (N-X) |
|--------------------|----------------------|------------------------------|-----------------------|----------------------------|
| Binding energy(eV) | ~398.3               | ~400.0                       | ~401.1                | ~403.4-405.6               |
| NCG <sub>Cu</sub>  | 21.20                | 41.32                        | 22.03                 | 15.45                      |
| NC <sub>Cu</sub>   | 26.31                | 37.58                        | 21.73                 | 14.38                      |
| NCG <sub>Fe</sub>  | 36.39                | 27.65                        | 22.13                 | 13.83                      |
| NC <sub>Fe</sub>   | 37.79                | 25.94                        | 25.55                 | 12.72                      |
| NCG <sub>Zn</sub>  | 32.34                | 29.39                        | 24.44                 | 13.83                      |
| NC <sub>Zn</sub>   | 33.70                | 33.07                        | 21.30                 | 11.93                      |

**Table S5.** Relative ratio (%) of different oxygen components in NCG<sub>Cu</sub>, NC<sub>Cu</sub>, NCG<sub>Fe</sub>, NC<sub>Fe</sub>, NCG<sub>Zn</sub> and NC<sub>Zn</sub> from O 1s XPS spectra which were calculated based on the areas of the XPS peaks

| Samples            | C=O<br>(O-I) | C-OH, C-O-C<br>(O-II) | COOH<br>(O-III) |
|--------------------|--------------|-----------------------|-----------------|
| Binding energy(eV) | 531.0        | 532.4                 | 533.6           |
| NCG <sub>Cu</sub>  | 48.22        | 35.06                 | 16.72           |
| NC <sub>Cu</sub>   | 49.52        | 33.78                 | 16.70           |
| NCG <sub>Fe</sub>  | 37.94        | 34.49                 | 27.57           |
| NC <sub>Fe</sub>   | 45.37        | 28.71                 | 28.72           |
| NCG <sub>Zn</sub>  | 30.16        | 28.76                 | 41.08           |
| NC <sub>Zn</sub>   | 40.54        | 35.01                 | 24.45           |

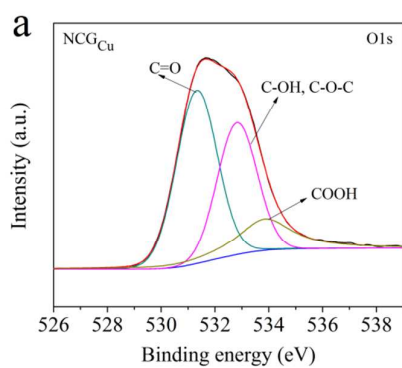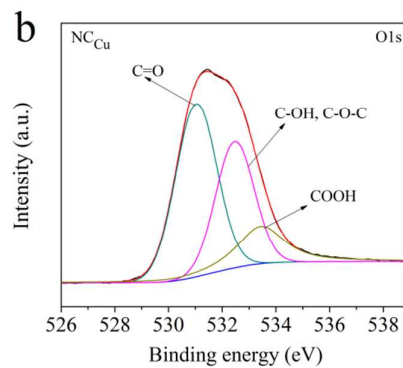

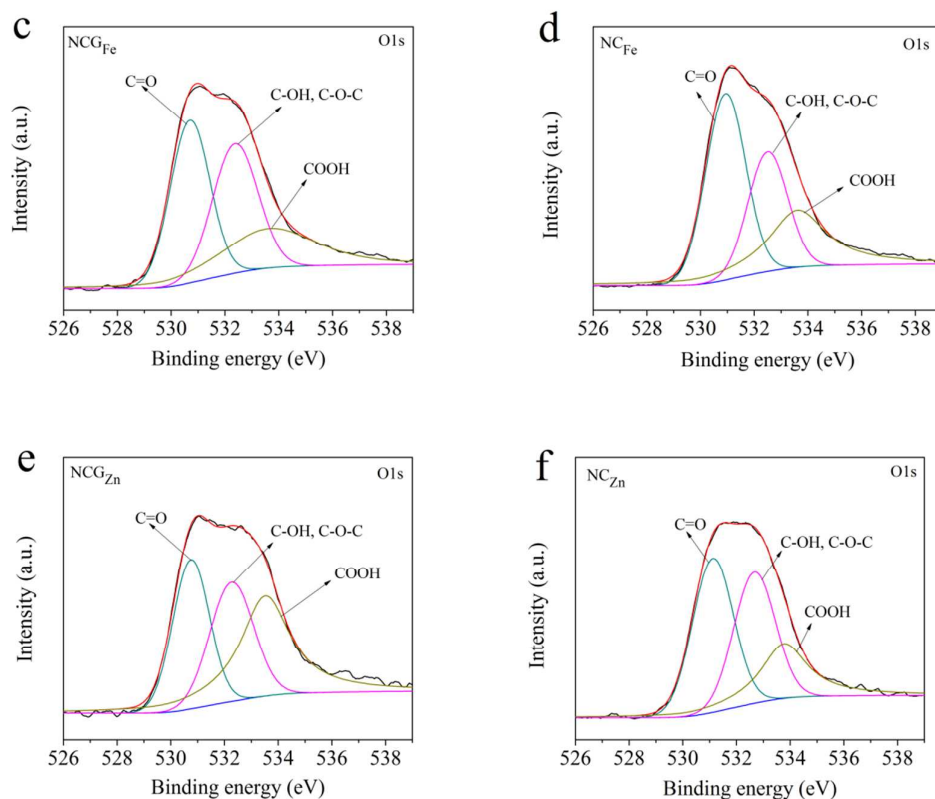

**Figure S3.** O 1s spectra of (a) NCG<sub>Cu</sub>, (b) NC<sub>Cu</sub>, (c) NCG<sub>Fe</sub>, (d) NC<sub>Fe</sub>, (e) NCG<sub>Zn</sub> and (f) NC<sub>Zn</sub>.

**4. Electrochemical characterization of supercapacitors based on NCG<sub>Cu</sub> and the affect factors, such as the amount of BPD, CuCl<sub>2</sub>, and pyrolysis temperature, to their electrochemical performances.**

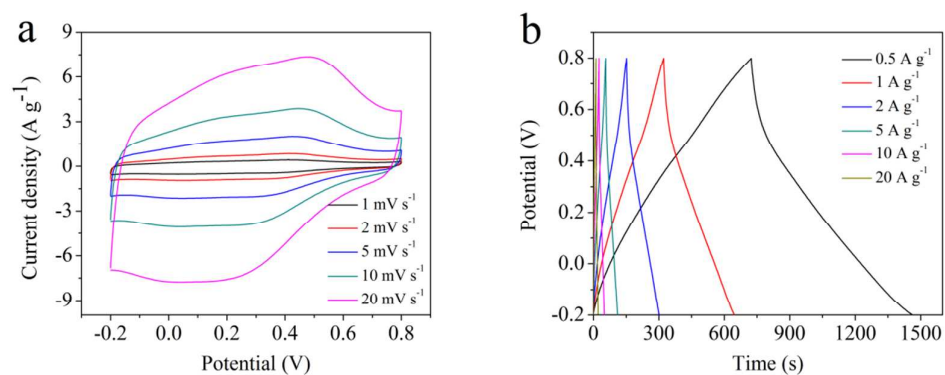

**Figure S4.** Electrochemical characterization of supercapacitors based on NCG<sub>Cu</sub> (The

mass ratio of GO/BPD was 1:10, the molar ratio of BPD/CuCl<sub>2</sub> was 1:0.6, and the pyrolysis temperature was 650°C. ): (a) Cyclic voltammetry curves at different scan rates (1-20 mV s<sup>-1</sup>). (b) Galvanostatic charge/discharge curves at different current densities (0.5-20 A g<sup>-1</sup>).

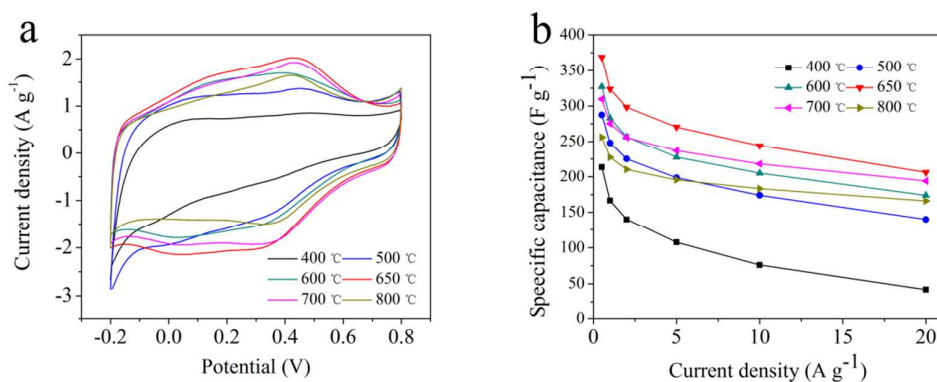

**Figure S5.** Electrochemical characterization of supercapacitors based on NCGCu samples with different pyrolysis temperature (400, 500, 600, 650, 700 and 800°C, respectively): (a) Cyclic voltammetry curves at a scan rates of 5 mV s<sup>-1</sup>. (b) The specific capacitances at different current density ranging from 0.5 to 20 A g<sup>-1</sup>.

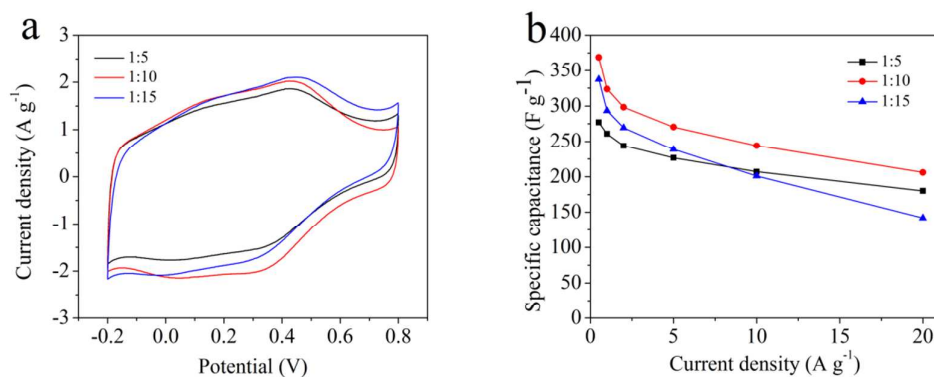

**Figure S6.** Electrochemical characterization of supercapacitors based on NCGCu samples with different mass ratio of GO/BPD (1:5, 1:10 and 1:15): (a) Cyclic voltammetry curves at a scan rate of 5 mV s<sup>-1</sup>. (b) The specific capacitances at

different current density ranging from 0.5 to 20  $\text{A g}^{-1}$ .

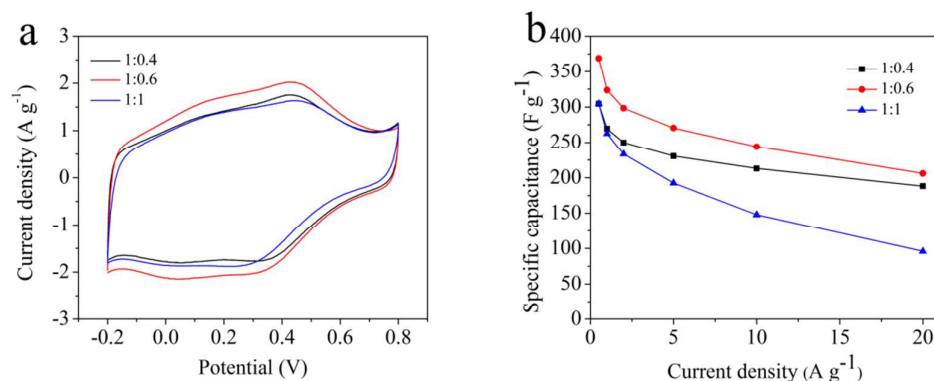

**Figure S7.** Electrochemical characterization of supercapacitors based on  $\text{NCG}_{\text{Cu}}$  samples with different molar ratio of  $\text{BPD}/\text{CuCl}_2$  (1:0.4, 1:0.6 and 1:1, respectively): (a) Cyclic voltammetry curves at a scan rates of  $5 \text{ mV s}^{-1}$ . (b) The specific capacitances at different current density ranging from 0.5 to  $20 \text{ A g}^{-1}$ .

**5. Electrochemical characterization of supercapacitors based on  $\text{NCG}_{\text{Fe}}$  and the affect factors (including the amount of BPD,  $\text{FeCl}_3$ , and pyrolysis temperature) to their electrochemical performances.**

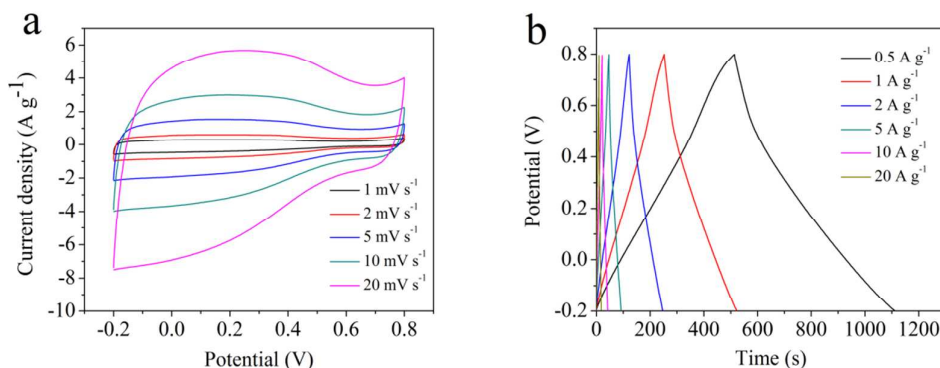

**Figure S8.** Electrochemical characterization of supercapacitors based on  $\text{NCG}_{\text{Fe}}$  (The mass ratio of  $\text{GO}/\text{BPD}$  was 1:10, the molar ratio of  $\text{BPD}/\text{FeCl}_3$  was 1:0.6, and the pyrolysis temperature was  $600^\circ\text{C}$ .): (a) Cyclic voltammetry curves at different scan

rates (1-20  $\text{mV s}^{-1}$ ). (b) Galvanostatic charge/discharge curves at different current densities (0.5-20  $\text{A g}^{-1}$ ).

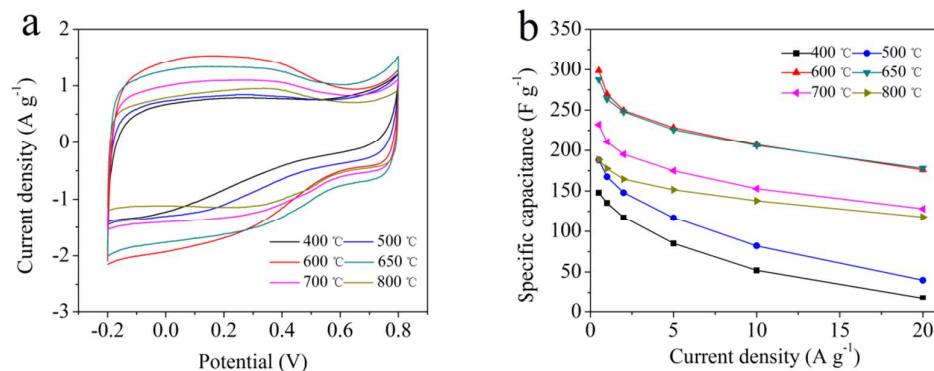

**Figure S9.** Electrochemical characterization of supercapacitors based on  $\text{NCG}_{\text{Fe}}$  samples with different pyrolysis temperature (400, 500, 600, 650, 700 and 800 °C, respectively): (a) Cyclic voltammetry curves at a scan rates of  $5 \text{ mV s}^{-1}$ . (b) The specific capacitances at different current density ranging from 0.5 to  $20 \text{ A g}^{-1}$ .

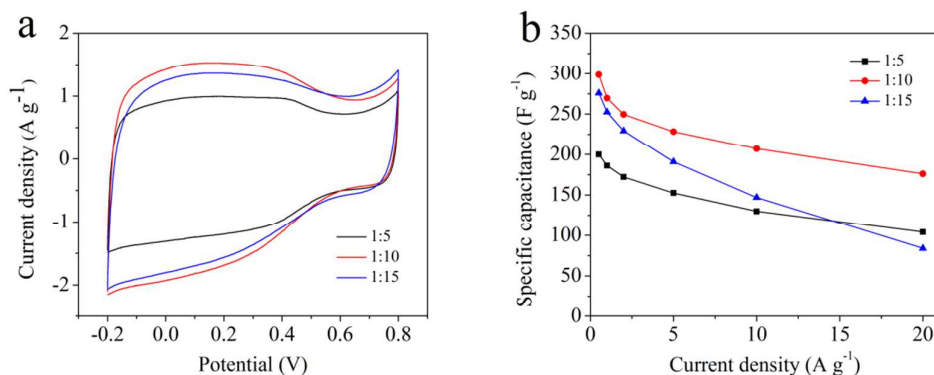

**Figure S10.** Electrochemical characterization of supercapacitors based on  $\text{NCG}_{\text{Fe}}$  samples with different mass ratio of GO/BPD (1:5, 1:10 and 1:15, respectively): (a) Cyclic voltammetry curves at a scan rates of  $5 \text{ mV s}^{-1}$ . (b) The specific capacitances at different current density ranging from 0.5 to  $20 \text{ A g}^{-1}$ .

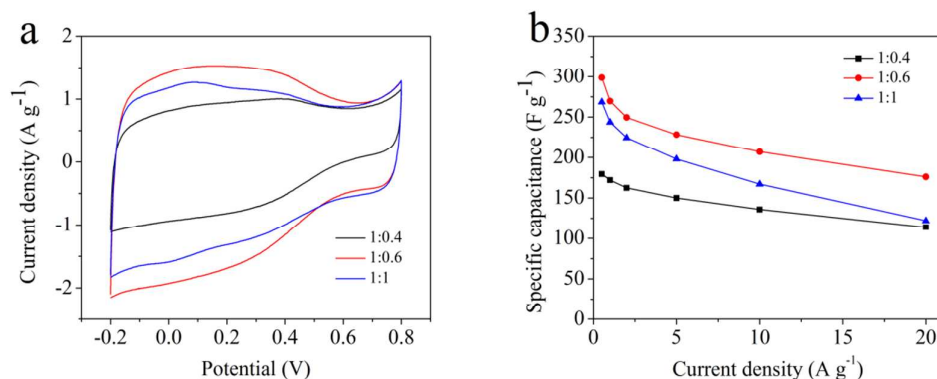

**Figure S11.** Electrochemical characterization of supercapacitors based on NCG<sub>Fe</sub> samples with different molar ratio of BPD/FeCl<sub>3</sub> (1:0.4, 1:0.6 and 1:1, respectively): (a) Cyclic voltammetry curves at a scan rates of 5 mV s<sup>-1</sup>. (b) The specific capacitances at different current density ranging from 0.5 to 20 A g<sup>-1</sup>.

**6. Electrochemical characterization of supercapacitors based on NCG<sub>Zn</sub> and the affect factors (including the amount of BPD, ZnCl<sub>2</sub>, and pyrolysis temperature) to their electrochemical performances.**

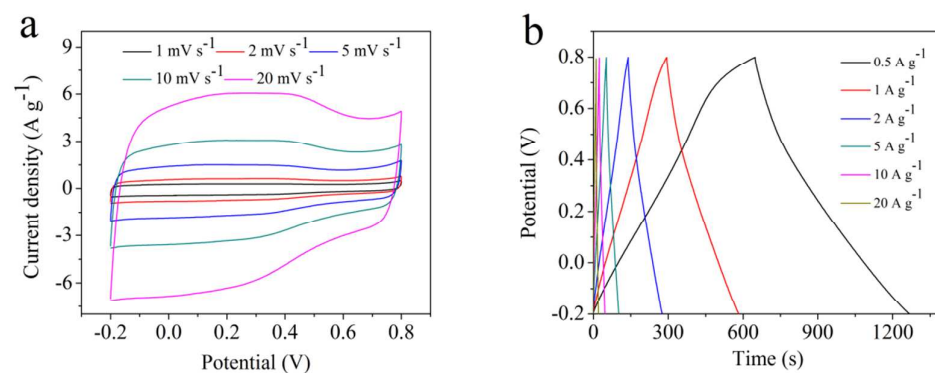

**Figure S12.** Electrochemical characterization of supercapacitors based on NCG<sub>Zn</sub> (The mass ratio of GO/BPD was 1:10, the molar ratio of BPD/ZnCl<sub>2</sub> was 1:0.6, and the pyrolysis temperature was 650°C.): (a) Cyclic voltammetry curves at different scan rates (1-20 mV s<sup>-1</sup>). (b) Galvanostatic charge/discharge curves at different current

densities ( $0.5\text{--}20\text{ A g}^{-1}$ ).

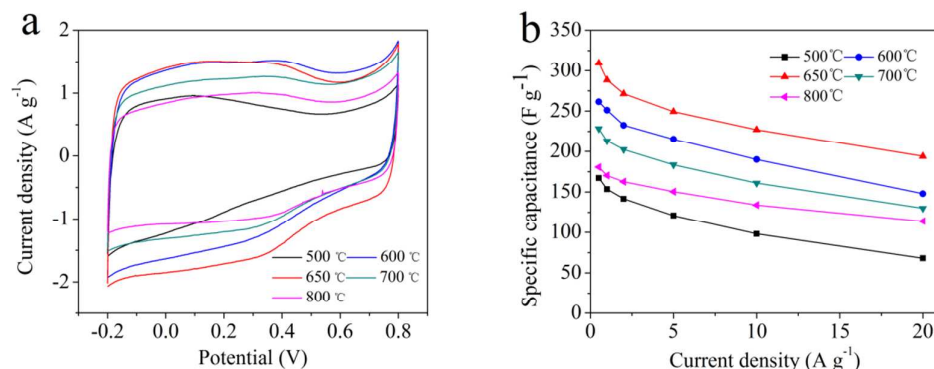

**Figure S13.** Electrochemical characterization of supercapacitors based on NCG<sub>Zn</sub> samples with different pyrolysis temperature (500, 600, 650, 700 and 800 °C, respectively): (a) Cyclic voltammograms at a scan rates of  $5\text{ mV s}^{-1}$ . (b) The specific capacitances at different current density ranging from  $0.5\text{ to }20\text{ A g}^{-1}$ .

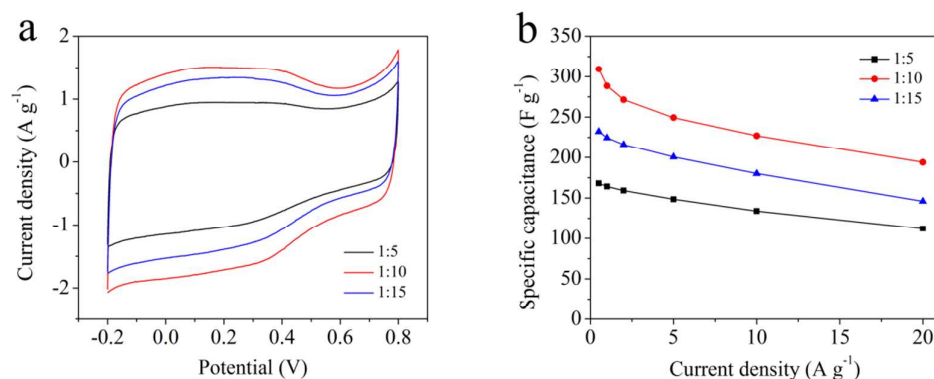

**Figure S14.** Electrochemical characterization of supercapacitors based on NCG<sub>Zn</sub> samples with different mass ratio of GO/BPD (1:5, 1:10 and 1:15, respectively): (a) Cyclic voltammograms at a scan rates of  $5\text{ mV s}^{-1}$ . (b) The specific capacitances at different current density ranging from  $0.5\text{ to }20\text{ A g}^{-1}$ .

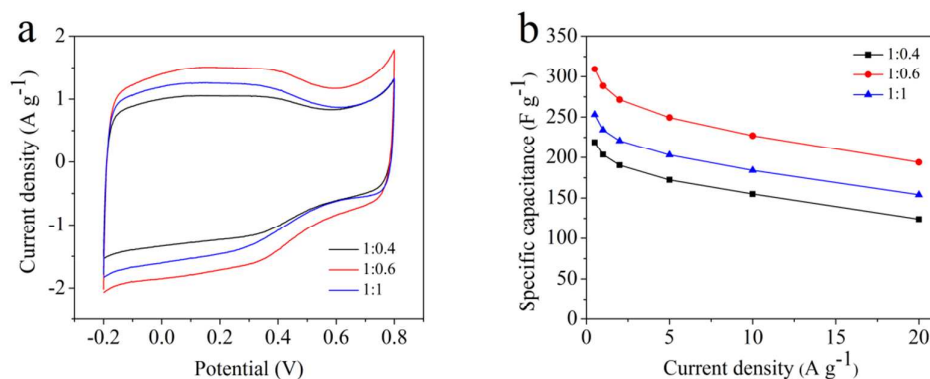

**Figure S15.** Electrochemical characterization of supercapacitors based on NCG<sub>Zn</sub> samples with different molar ratio of BPD/ZnCl<sub>2</sub> (1:0.4, 1:0.6 and 1:1, respectively): (a) Cyclic voltammetry curves at a scan rates of 5 mV s<sup>-1</sup>. (b) The specific capacitances at different current density ranging from 0.5 to 20 A g<sup>-1</sup>.

## 7. The comparison of electrochemical properties of the reported materials and the present work.

**Table S6.** The comparison of gravimetric specific capacitances of the reported N-doped carbons or nitrogen-doped graphene/carbon composite materials and the present work

| Samples                                          | C (F g <sup>-1</sup> )         | Ref |
|--------------------------------------------------|--------------------------------|-----|
| 3D hierarchical porous carbon fibers             | 329 (0.1 A g <sup>-1</sup> )   | 1   |
| Activated polyaniline-based carbon nanoparticles | 331 (0.2 A g <sup>-1</sup> )   | 2   |
| Hierarchical porous and N-doped carbon nanotubes | 365.9 (0.1 A g <sup>-1</sup> ) | 3   |
| 3D hierarchical porous carbon                    | 318.2 (0.5 A g <sup>-1</sup> ) | 4   |
| Biomass-derived nitrogen-doped porous carbon     | 320 (0.5 A g <sup>-1</sup> )   | 5   |
| Hierarchical nitrogen-doped porous carbon        | 239 (5 mV s <sup>-1</sup> )    | 6   |

|                                                                      |                                |           |
|----------------------------------------------------------------------|--------------------------------|-----------|
| Graphitized nanoporous carbons                                       | 238 (20 mV s <sup>-1</sup> )   | 7         |
| Porous carbons                                                       | 272 (5 mV s <sup>-1</sup> )    | 8         |
| Porous carbons                                                       | 214 (5 mV s <sup>-1</sup> )    | 9         |
| Porous carbons                                                       | 211 (10 mV s <sup>-1</sup> )   | 10        |
| Hollow, spherical nitrogen-rich porous carbon shells                 | 230 (0.5 A g <sup>-1</sup> )   | 11        |
| Heavily nitrogenated graphene oxide                                  | 320 (0.3 A g <sup>-1</sup> )   | 12        |
| Graphene-incorporated nitrogen-rich carbon composite                 | 300 (0.1 A g <sup>-1</sup> )   | 13        |
| Graphene/nitrogen-doped ordered mesoporous carbon nanosheet          | 377 (0.2 A g <sup>-1</sup> )   | 14        |
| Hierarchical porous N-doped sandwich-type carbon composites          | 340 (0.5 A g <sup>-1</sup> )   | 15        |
| Nitrogen-doped carbon decorated graphene                             | 289 (0.2 A g <sup>-1</sup> )   | 16        |
| Three-dimensional nitrogen-doped hierarchical porous carbon/graphene | 318 (1 A g <sup>-1</sup> )     | 17        |
| N-doped activated composite                                          | 267 (5 mV s <sup>-1</sup> )    | 18        |
| Porous nitrogen-doped graphene/carbon nanotubes composite            | 246.6 (0.5 A g <sup>-1</sup> ) | 19        |
| Sandwich-like nitrogen-enriched porous carbon/graphene composites    | 381.6 (0.1 A g <sup>-1</sup> ) | 20        |
| NCG <sub>Cu</sub>                                                    | 369 (0.5 A g <sup>-1</sup> )   | This work |
| NCG <sub>Fe</sub>                                                    | 298.5 (0.5 A g <sup>-1</sup> ) | This work |
| NCG <sub>Zn</sub>                                                    | 309.5 (0.5 A g <sup>-1</sup> ) | This work |

**Table S7.** The comparison of volumetric specific capacitances of the reported carbon materials and the present work

| Samples                                                        | C (F cm <sup>-3</sup> )        | Ref       |
|----------------------------------------------------------------|--------------------------------|-----------|
| Densely packed graphene nanomesh-carbon nanotube hybrid film   | 331 (5 mV s <sup>-1</sup> )    | 21        |
| Liquid-mediated dense integration of graphene materials        | 261.3 (0.5 A g <sup>-1</sup> ) | 22        |
| Compactly interlinked graphene nanosheets                      | 376 (0.1 A g <sup>-1</sup> )   | 23        |
| High density reduced graphite oxide                            | 255 (1 A g <sup>-1</sup> )     | 24        |
| Free-standing boron and oxygen co-doped carbon nanofiber films | 179.3 (1 A g <sup>-1</sup> )   | 25        |
| Sandwiched graphene/porous carbon layers                       | 212 (0.5 A g <sup>-1</sup> )   | 26        |
| Porous layer-stacking carbon                                   | 360 (0.5 A g <sup>-1</sup> )   | 27        |
| Crumpled nitrogen-doped graphene                               | 98 (1 A g <sup>-1</sup> )      | 28        |
| Nitrogen-doped sandwich-like porous carbon nanosheets          | 287 (2 mV s <sup>-1</sup> )    | 29        |
| Oxygen- and nitrogen-enriched 3D porous carbon                 | 360 (0.5 A g <sup>-1</sup> )   | 30        |
| Functionalized porous carbon                                   | 468 (0.5 A g <sup>-1</sup> )   | 31        |
| NCG <sub>Cu</sub>                                              | 560.9 (0.5 A g <sup>-1</sup> ) | This work |
| NCG <sub>Fe</sub>                                              | 278.2 (0.5 A g <sup>-1</sup> ) | This work |
| NCG <sub>Zn</sub>                                              | 355.9 (0.5 A g <sup>-1</sup> ) | This work |

## References

- (1) Li, Y.; Lu, C.; Zhang, S.; Su, F.-Y.; Shen, W.; Zhou, P.; Ma, C. Nitrogen- and Oxygen-Enriched 3D Hierarchical Porous Carbon Fibers: Synthesis and Superior Supercapacity. *J. Mater. Chem. A* **2015**, *3*, 14817-14825.
- (2) Zhou, J.; Zhu, T.; Xing, W.; Li, Z.; Shen H.; Zhuo, S. Activated Polyaniline-Based Carbon Nanoparticles for High Performance Supercapacitors. *Electrochim. Acta* **2015**, *160*, 152-159.
- (3) Zhu, T.; Zhou, J.; Li, Z.; Li, S.; Si, W.; Zhuo, S. Hierarchical Porous and N-doped Carbon Nanotubes Derived from Polyaniline for Electrode Materials in Supercapacitors. *J. Mater. Chem. A* **2014**, *2*, 12545-12551.
- (4) Qie, L.; Chen, W.; Xu, H.; Xiong, X.; Jiang, Y.; Zou, F.; Hu, X.; Xin, Y.; Zhang, Z.; Huang, Y. Synthesis of Functionalized 3D Hierarchical Porous Carbon for High-Performance Supercapacitors. *Energy Environ. Sci.* **2013**, *6*, 2497-2504.
- (5) Wei, T.; Wei, X.; Gao, Y.; Li, H. Large Scale Production of Biomass-Derived Nitrogen-Doped Porous Carbon Materials for Supercapacitors. *Electrochim. Acta* **2015**, *169*, 186-194.
- (6) Jeon, J.-W.; Sharma, R.; Meduri, P.; Arey, B. W.; Schaefer, H. T.; Lutkenhaus, J. L.; Lemmon, J. P.; Thallapally, P. K.; Nandasiri, M. I.; McGrail, B. P.; Nune, S. K. *In Situ* One-Step Synthesis of Hierarchical Nitrogen-Doped Porous Carbon for High-Performance Supercapacitors. *ACS Appl. Mater. Interfaces* **2014**, *6*, 7214-7222.
- (7) Torad, N. L.; Salunkhe, R. R.; Li, Y.; Hamoudi, H.; Imura, M.; Sakka, Y.; Hu,

- C.-C.; Yamauchi, Y. Electric Double-Layer Capacitors Based on Highly Graphitized Nanoporous Carbons Derived from ZIF-67. *Chem. Eur. J.* **2014**, *20*, 7895-7900.
- (8) Salunkhe, R. R.; Tang, J.; Kamachi, Y.; Nakato, T.; Kim, J. H.; Yamauchi, Y. Asymmetric Supercapacitors Using 3D Nanoporous Carbon and Cobalt Oxide Electrodes Synthesized from a Single Metal-Organic Framework. *ACS Nano* **2015**, *9*, 6288-6296.
- (9) Chaikittisilp, W.; Hu, M.; Wang, H.; Huang, H.-S.; Fujita, T.; Wu, K. C.-W.; Chen, L.-C.; Yamauchi, Y.; Ariga, K. Nanoporous Carbons through Direct Carbonization of a Zeolitic Imidazolate Framework for Supercapacitor Electrodes. *Chem. Commun.* **2012**, *48*, 7259-7261.
- (10) Amali, A. J.; Sun, J.-K.; Xu, Q. From Assembled Metal-Organic Framework Nanoparticles to Hierarchically Porous Carbon for Electrochemical Energy Storage. *Chem. Commun.* **2014**, *50*, 1519-1522.
- (11) Liu, X.; Zhou, L.; Zhao, Y.; Bian, L.; Feng, X.; Pu, Q. Hollow, Spherical Nitrogen-Rich Porous Carbon Shells Obtained from a Porous Organic Framework for the Supercapacitor. *ACS Appl. Mater. Interfaces* **2013**, *5*, 10280-10287.
- (12) Gopalakrishnan, K.; Govindaraj, A.; Rao, C. N. R. Extraordinary Supercapacitor Performance of Heavily Nitrogenated Graphene Oxide Obtained by Microwave Synthesis. *J. Mater. Chem. A* **2013**, *1*, 7563-7565.
- (13) Fan, X.; Yu, C.; Yang, J.; Ling, Z.; Qiu, J. Hydrothermal Synthesis and Activation

- of Graphene-Incorporated Nitrogen-Rich Carbon Composite for High-Performance Supercapacitors. *Carbon* **2014**, *70*, 130-141.
- (14) Song, Y.; Yang, J.; Wang, K.; Haller, S.; Wang, Y.; Wang, C.; Xia, Y. *In-Situ* Synthesis of Graphene/Nitrogen-Doped Ordered Mesoporous Carbon Nanosheet for Supercapacitor Application. *Carbon* **2016**, *96*, 955-964.
- (15) Luo, H.; Liu, Z.; Chao, L.; Wu, X.; Lei, X.; Chang, Z.; Sun, X. Synthesis of Hierarchical Porous N-Doped Sandwich-Type Carbon Composites as High-Performance Supercapacitor Electrodes. *J. Mater. Chem. A* **2015**, *3*, 3667-3675.
- (16) Li, M.; Xue, J. Integrated Synthesis of Nitrogen-Doped Mesoporous Carbon from Melamine Resins with Superior Performance in Supercapacitors. *J. Phys. Chem. C* **2014**, *118*, 2507-2517.
- (17) Yin, Y.; Li, R.; Li, Z.; Liu, J.; Gu, Z.; Wang, G. A Facile Self-Template Strategy to Fabricate Three-Dimensional Nitrogen-Doped Hierarchical Porous Carbon/Graphene for Conductive Agent-Free Supercapacitors with Excellent Electrochemical Performance. *Electrochim. Acta* **2014**, *125*, 330-337.
- (18) Gharehkhani, S.; Shirazi, S. F. S.; Jahromi, S. P.; Sookhakian, M.; Baradaran, S.; Yarmand, H.; Oshkour, A. A.; Kazia, S. N.; Basirunde, W. J. Spongy Nitrogen-Doped Activated Carbonaceous Hybrid Derived from Biomass Material/Graphene Oxide for Supercapacitor Electrodes. *RSC Adv.* **2015**, *5*, 40505-40513.
- (19) Lin, T.-T.; Lai, W.-H.; Lü, Q.-F.; Yu, Y. Porous Nitrogen-Doped

- Graphene/Carbon Nanotubes Composite with an Enhanced Supercapacitor Performance. *Electrochim. Acta* **2015**, *178*, 517-524.
- (20) Xie, Q.; Zhou, S.; Zheng, A.; Xie, C.; Yin, C.; Wu, S.; Zhang, Y.; Zhao, P. Sandwich-Like Nitrogen-Enriched Porous Carbon/Graphene Composites as Electrodes for Aqueous Symmetric Supercapacitors with High Energy Density. *Electrochim. Acta* **2016**, *189*, 22-31.
- (21) Jiang, L.; Sheng, L.; Long, C.; Fan, Z. Densely Packed Graphene Nanomesh-Carbon Nanotube Hybrid Film for Ultra-High Volumetric Performance Supercapacitors. *Nano Energy* **2015**, *11*, 471-480.
- (22) Yang, X.; Cheng, C.; Wang, Y.; Qiu, L.; Li, D. Liquid-Mediated Dense Integration of Graphene Materials for Compact Capacitive Energy Storage. *Science* **2013**, *341*, 534-537.
- (23) Tao, Y.; Xie, X.; Lv, W.; Tang, D.-M.; Kong, D.; Huang, Z.; Nishihara, H.; Ishii, T.; Li, B.; Golberg, D.; Kang, F.; Kyotani, T.; Yang, Q. -H. Towards Ultrahigh Volumetric Capacitance: Graphene Derived Highly Dense but Porous Carbons for Supercapacitors. *Sci. Rep.* **2013**, *3*, 2975.
- (24) Li, Y.; Zhao, D. Preparation of Reduced Graphite Oxide with High Volumetric Capacitance in Supercapacitors. *Chem. Commun.* **2015**, *51*, 5598-5601.
- (25) Yu, Z.-Y.; Chen, L.-F.; Song, L.-T.; Zhu, Y.-W.; Ji, H.-X.; Yu, S.-H. Free-Standing Boron and Oxygen Co-Doped Carbon Nanofiber Films for Large Volumetric Capacitance and High Rate Capability Supercapacitors. *Nano Energy* **2015**, *15*, 235-243.

- (26) Yan, J.; Wang, Q.; Lin, C.; Wei, T.; Fan, Z. Interconnected Frameworks with a Sandwiched Porous Carbon Layer/Graphene Hybrids for Supercapacitors with High Gravimetric and Volumetric Performances. *Adv. Energy Mater.* **2014**, *4*, 1400500.
- (27) Long, C.; Chen, X.; Jiang, L.; Zhi, L.; Fan, Z. Porous Layer-Stacking Carbon Derived from In-Built Template in Biomass for High Volumetric Performance Supercapacitors. *Nano Energy* **2015**, *12*, 141-151.
- (28) Wang, J.; Ding, B.; Xu, Y.; Shen, L.; Dou, H.; Zhang, X. Crumpled Nitrogen-Doped Graphene for Supercapacitors with High Gravimetric and Volumetric Performances. *ACS Appl. Mater. Interfaces* **2015**, *7*, 22284-22291.
- (29) Wang, Q.; Yan, J.; Fan, Z. Nitrogen-Doped Sandwich-Like Porous Carbon Nanosheets for High Volumetric Performance Supercapacitors. *Electrochim. Acta* **2014**, *146*, 548-555.
- (30) Li, J.; Liu, K.; Gao, X.; Yao, B.; Huo, K.; Cheng, Y.; Cheng, X.; Chen, D.; Wang, B.; Sun, W.; Ding, D.; Liu, M.; Huang, L. Oxygen- and Nitrogen-Enriched 3D Porous Carbon for Supercapacitors of High Volumetric Capacity. *ACS Appl. Mater. Interfaces* **2015**, *7*, 24622-24628.
- (31) Long, C.; Jiang, L.; Wu, X.; Jiang, Y.; Yang, D.; Wang, C.; Wei, T.; Fan, Z. Facile Synthesis of Functionalized Porous Carbon with Three-Dimensional Interconnected Pore Structure for High Volumetric Performance Supercapacitors. *Carbon* **2015**, *93*, 412-420.
